# Supplementary material
Source: Springer Nature journal article supplement (https://www.springermedizin.de/resource/supplementary/12913_2013_3118_MOESM2_ESM.pdf/9532462)
Supplement: MOESM2 [file 9532462]

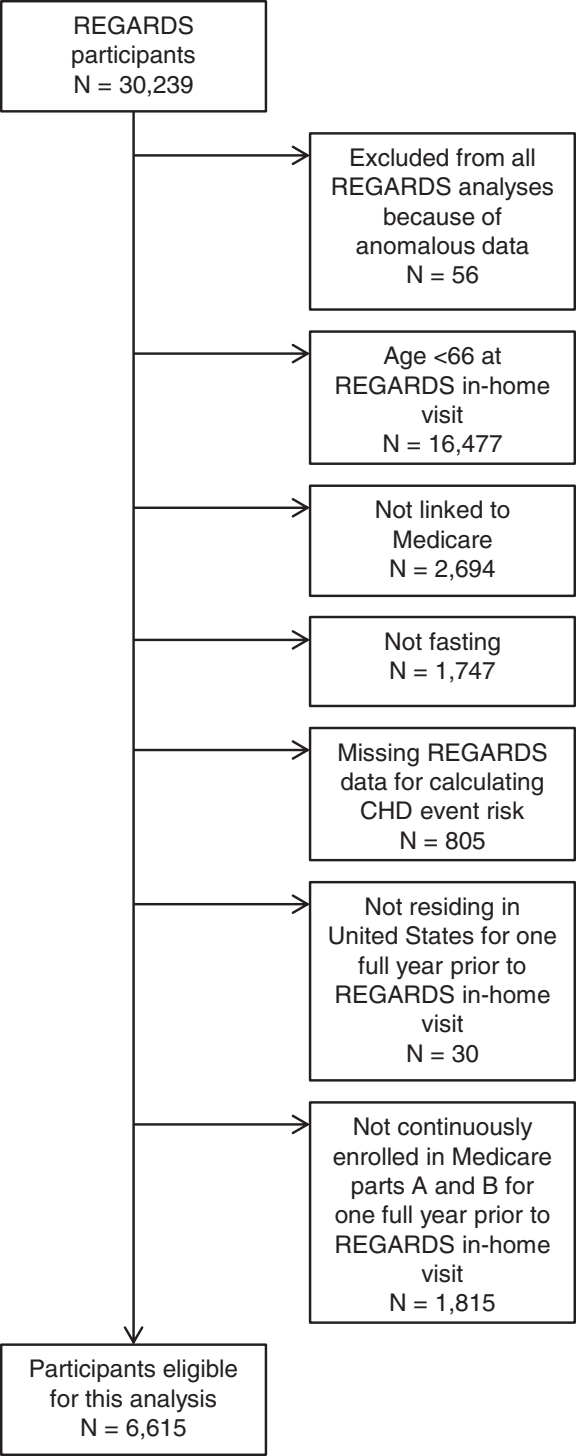

REGARDS  
participants  
N = 30,239

Excluded from all  
REGARDS analyses  
because of  
anomalous data  
N = 56

Age <66 at  
REGARDS in-home  
visit  
N = 16,477

Not linked to  
Medicare  
N = 2,694

Not fasting  
N = 1,747

Missing REGARDS  
data for calculating  
CHD event risk  
N = 805

Not residing in  
United States for one  
full year prior to  
REGARDS in-home  
visit  
N = 30

Not continuously  
enrolled in Medicare  
parts A and B for  
one full year prior to  
REGARDS in-home  
visit  
N = 1,815

Participants eligible  
for this analysis  
N = 6,615
